# Supplementary material for: Ionic liquids containing tricyanomethanide anions: physicochemical characterisation and performance as electrochemical double-layer capacitor electrolytes
Source: Royal Society of Chemistry journal article supplement (doi:10.1039/c7cp03377j), 2017-01-01
Supplement: c7cp03377j1.pdf [file c7cp03377j1.pdf]

# Ionic Liquids Containing Tricyanomethanide Anions: Physicochemical Characterisation and Performance as Electrochemical Double-Layer Capacitor Electrolytes

V. L. Martins,<sup>a,b\*</sup> A. J. R. Rennie,<sup>a\*</sup> R. M. Torresi<sup>b</sup> and P. J. Hall<sup>a</sup>

<sup>a</sup> Chemical and Biological Engineering, University of Sheffield, Sir Robert Hadfield Building,  
Mappin Street, Sheffield S1 3JD, England, UK

<sup>b</sup> Instituto de Química, Universidade de São Paulo - C.P. 26077, CEP 05513-970, São Paulo,  
SP, Brazil

\*Corresponding Authors: [v.l.martins@sheffield.ac.uk](mailto:v.l.martins@sheffield.ac.uk); [a.rennie@sheffield.ac.uk](mailto:a.rennie@sheffield.ac.uk)

## Supporting Information

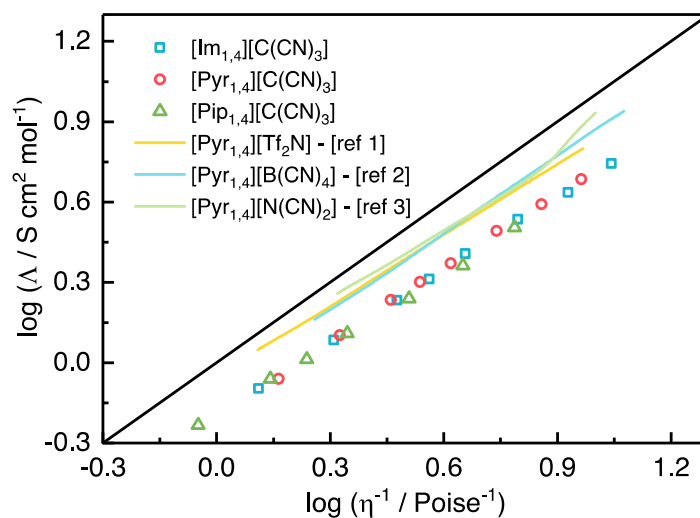

Figure S 1. Walden plot of [Im<sub>1,4</sub>][C(CN)<sub>3</sub>], [Pyr<sub>1,4</sub>][C(CN)<sub>3</sub>] and [Pip<sub>1,4</sub>][C(CN)<sub>3</sub>]. Line presents the ideal KCl relationship. As closer to the line, higher the liquid ionicity.

Table S 1. Parameter obtained with the best fit by VTF equation for viscosity.

|                                            | Viscosity VTF fit   |          |              |          |
|--------------------------------------------|---------------------|----------|--------------|----------|
|                                            | $\eta_0$<br>(mPa s) | B<br>(K) | $T_0$<br>(K) | B/ $T_0$ |
| [Im <sub>1,4</sub> ][C(CN) <sub>3</sub> ]  | 0.298               | 499.2    | 188.8        | 2.64     |
| [Pyr <sub>1,4</sub> ][C(CN) <sub>3</sub> ] | 0.261               | 623.0    | 160.0        | 3.89     |
| [Pip <sub>1,4</sub> ][C(CN) <sub>3</sub> ] | 0.237               | 642.6    | 181.2        | 3.55     |

Table S 2. Parameter obtained with the best fit by VTF equation for ionic conductivity.

|                                            | Ionic conductivity VTF fit           |          |              |          |
|--------------------------------------------|--------------------------------------|----------|--------------|----------|
|                                            | $\sigma_0$<br>(mS cm <sup>-1</sup> ) | B<br>(K) | $T_0$<br>(K) | B/ $T_0$ |
| [Im <sub>1,4</sub> ][C(CN) <sub>3</sub> ]  | 36.5                                 | 359.3    | 199.7        | 1.80     |
| [Pyr <sub>1,4</sub> ][C(CN) <sub>3</sub> ] | 32.5                                 | 403.7    | 186.8        | 2.16     |

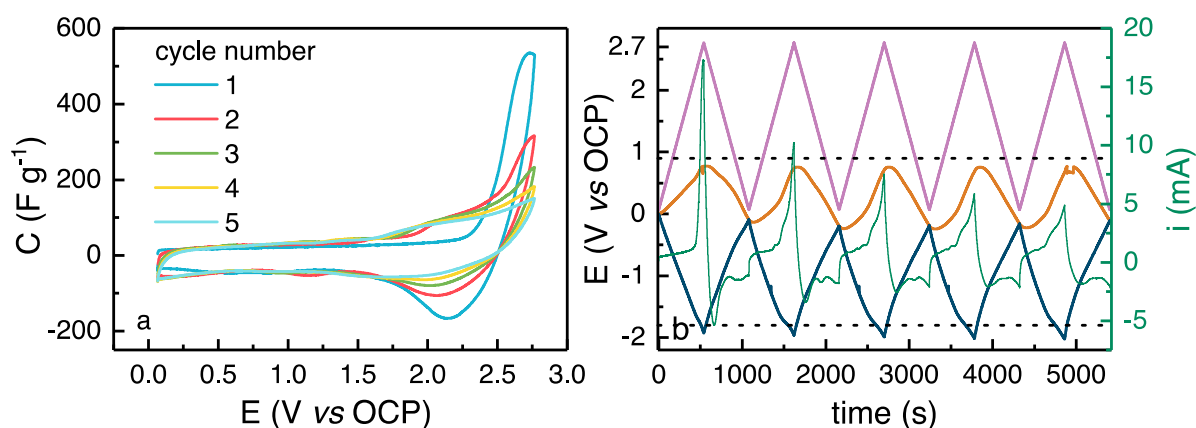

Figure S 2. (a) cyclic voltammograms at 5 mV s<sup>-1</sup> between 0 and 2.7 V of EDLC containing [Im<sub>1,4</sub>][C(CN)<sub>3</sub>] as electrolyte and electrodes mass ratio of 3.1. (b) Voltage applied across positive and negative electrode (pink), measured voltage of positive (orange) and negative (blue) electrodes vs a *quasi*-reference electrode (Pt) and the measure current (green).

## References

- 1 A. J. R. Rennie, V. L. Martins, R. M. Torresi and P. J. Hall, *J. Phys. Chem. C*, 2015, **119**, 23865–23874.
- 2 N. Sanchez-Ramirez, V. L. Martins, R. A. Ando, F. F. Camilo, S. M. Urahata, M. C. C. Ribeiro and R. M. Torresi, *J. Phys. Chem. B*, 2014, **118**, 8772–8781.
- 3 C. Wolff, S. Jeong, E. Paillard, A. Balducci and S. Passerini, *J. Power Sources*, 2015, **293**, 65–70.
